# Supplementary material for: Marker-Assisted Introgression of the Salinity Tolerance Locus Saltol in Temperate Japonica Rice
Source: PubMed Central journal article supplement (PMC9837369; doi:10.1186/s12284-023-00619-2), 2023-01-12
Supplement: 12284_2023_619_MOESM1_ESM.pdf [file 12284_2023_619_MOESM1_ESM.pdf]

**Additional file 1: Supplemental Figure**

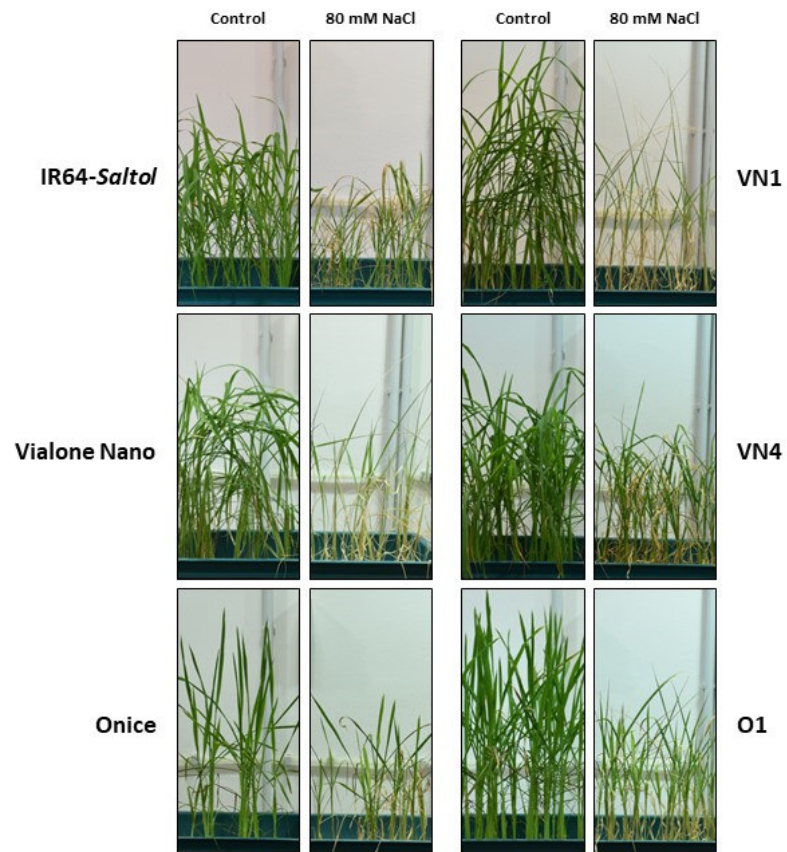

**Fig. S1** Visual symptoms of salt stress injuries (80 mM NaCl) after 14 days of salinization on shoots of the tolerant donor parent *IR64-Saltol*, susceptible recurrent parents *Vialone Nano* and *Onice*, and VN1, VN4, O1 introgression lines. Results from a representative experiment are shown.
